# Supplementary material for: Edge-to-edge interaction between carbon nanotube–pyrene complexes and electrodes for biosensing and electrocatalytic applications
Source: Royal Society of Chemistry journal article supplement (doi:10.1039/c4cp05153j), 2015-01-01
Supplement: c4cp05153j1.pdf [file c4cp05153j1.pdf]

## Edge-to-edge Interaction between Carbon Nanotube-Pyrene Complexes and Electrodes for Biosensing and Electrocatalytic Applications

Charuksha Walgama, Nicolas Means, Nicholas F. Materer, and Sadagopan Krishnan\*

Department of Chemistry, Oklahoma State University, Stillwater, OK 74078

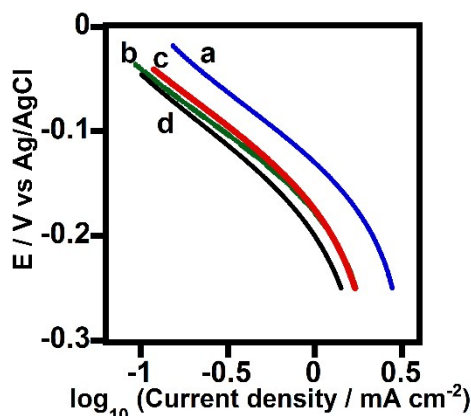

**Figure S1.** Tafel plots for peroxide reduction by MWNT/Py-Mb films on **a.** EP, **b.** BP, **c.** GC, and **d.** Au electrodes for the catalytic voltammograms shown in Figure 2.

### Experimental

#### *Chemicals and materials*

Disk electrodes made of purely EP or purely BP (Momentive Performance Materials Ltd.), and non-graphitic Au and GC electrodes (CH Instruments) were used in this study (geometric area of each electrode was 0.2 cm<sup>2</sup>). MWNT (outer diameter 10–15 nm, inner diameter 2–6 nm, length 0.1–10 μm), equine heart myoglobin (Mb, ≥ 90%, SDS-PAGE), dimethyl formamide (DMF), 1-pyrenebutyric acid (Py), t-Butyl hydroperoxide (t-BuOOH), 1-ethyl-3-[3-dimethylaminopropyl]carbodiimide hydrochloride, and N-hydroxysuccinimide were purchased from Sigma (Milwaukee, USA). All other chemicals were analytical grade.

#### *Preparation of protein films on various electrodes modified with MWNT/Py units.*

The procedure to covalently attach myoglobin to MWNT/Py-modified electrodes to obtain MWNT/Py-Mb films was similar to that described in our prior reports.<sup>1,2</sup> Briefly, 15 μL of 1 mg mL<sup>-1</sup> MWNT in DMF were dry coated on electrodes and π-π stacked with Py (10 mM in DMF) molecules. The Mb surface lysine residues (PDB: 2FRF) were covalently attached to the –COOH groups of the MWNT/Py surface of various electrodes by amine-carboxylic acid coupling chemistry (denoted as electrode/MWNT/Py-Mb, where electrode = EP, BP, GC, or Au). The electrochemical and electrocatalytic peroxide reduction properties of immobilized Mb on the designed electrode materials were investigated by cyclic voltammetry and rotating disk voltammetry (RDV) methods, respectively.

#### *Instrumentation*

Electrochemical measurements were performed using a CH instrument (Model: CHI 6017E, Texas, USA). RDV was performed to study the catalytic reduction rate of t-BuOOH at a rotation rate of 1000 rpm (EcoChemie Autolab rotator supplied with a motor controller, Metrohm Inc.). A three-electrode electrochemical cell equipped with an Ag/AgCl reference

(3 M KCl), a Pt-wire counter electrode, and MWNT/Py-Mb films on the various working electrodes were used. Fluorescence emission spectra of Py solutions were obtained using a Varian Cary eclipse fluorescence spectrophotometer. The excitation and emission slit widths were set at 5 nm. The excitation wavelength was set at 284 nm and emission was monitored at 377 nm. The X-ray photoelectron spectroscopy (XPS) analyses were performed using the Mg anode of a PHI 300 W twin anode X-ray source and the PHI double-pass cylindrical mirror analyzer as the detector with a pass energy of 100 eV. The instrument was equipped with a surface analysis system with a base pressure of  $2 \times 10^{-10}$  Torr. General survey scans were carried out for the EP/MWNT/Py-Mb and BP/MWNT/Py-Mb electrodes to qualitatively assess how the edge and basal plane effects on MWNT/Py modification and influence the surface density of immobilized Mb molecules.

---

1 C. Walgama and S. Krishnan, *J. Electrochem. Soc.*, 2014, **161**, H47.

2 S. Krishnan and F. A. Armstrong, *Chem. Sci.*, 2012, **3**, 1015.
